# Supplementary material for: Machine learning in medicine: a practical introduction
Source: PubMed Central journal article supplement (PMC6425557; doi:10.1186/s12874-019-0681-4), 2019-03-19
Supplement: 12874_2019_681_MOESM2_ESM.pdf [file 12874_2019_681_MOESM2_ESM.pdf]

# Machine learning in medicine : a practical introduction

Sidey-Gibbons JAM, Gibbons CJ

4/18/2018

## R Markdown supplementary material

This document accompanies the paper published

```
cancer = read.csv(paste0("http://archive.ics.uci.edu/ml/machine-learning-databases/",
  "breast-cancer-wisconsin/breast-cancer-wisconsin.data"), header = FALSE,
  stringsAsFactors = F) # Load dataset from the UCI repository.

names(cancer) = c("ID", "thickness", "cell_size", "cell_shape", "adhesion",
  "epithelial_size", "bare_nuclei", "bland_cromatin", "normal_nucleoli", "mitoses",
  "class") # Add names to the dataset.

cancer = as.data.frame(cancer)
cancer$bare_nuclei = replace(cancer$bare_nuclei, cancer$bare_nuclei == "?",
  NA) # Recode missing values with NA.
cancer = na.omit(cancer) # Remove rows with missing values.
cancer$class = (cancer$class/2) - 1 # Recode the class (outcome) variable to 1 and 2.

head(cancer) # Show the first 6 rows of the dataset
```

```
##      ID thickness cell_size cell_shape adhesion epithelial_size
## 1 1000025         5         1         1         1             2
## 2 1002945         5         4         4         5             7
## 3 1015425         3         1         1         1             2
## 4 1016277         6         8         8         1             3
## 5 1017023         4         1         1         3             2
## 6 1017122         8        10        10         8             7
##   bare_nuclei bland_cromatin normal_nucleoli mitoses class
## 1           1             3             1         1       0
## 2           10            3             2         1       0
## 3            2             3             1         1       0
## 4            4             3             7         1       0
## 5            1             3             1         1       0
## 6           10            9             7         1       1
```

```
set.seed(80817) # Set a random seed so that repeated analyses have the same outcome. Seeds are saved o
index = 1:nrow(cancer) #Create an index vector with as many sequential variables as there are rows in
testindex = sample(index, trunc(length(index)/3)) #Take a sample of 33.3% of the variables from the in
testset = cancer[testindex, ] #Create a test (validation) dataset with 33.3% of the data.
trainset = cancer[-testindex, ] #Create a training dataset with 66.6% of the data.
```

```
x_train = data.matrix(trainset[, 2:10]) # Take the features (x) from the training dataset.
y_train = as.numeric(trainset[, 11]) # Take the outcomes (y) from the training dataset.
```

```
x_test = data.matrix(testset[, 2:10]) # Take the features (x) from the testing/validation dataset.
y_test = as.numeric(testset[, 11]) # Take the outcomes (y) from the testing/validation dataset.
```

```
# You can use the dim() function to assess the dimension of each matrix
```

```
# (e.g., dim(x_train))
```

```
# install.packages('glmnet',repos=getOption('repos')) Install latest version  
# of `glmnet`. Only necessary once.
```

```
require(glmnet) # Load glmnet package into this R session.
```

```
glm_model = cv.glmnet(x_train, y_train, alpha=1, nfolds=10) # 10-fold cross validation of the LASSO-reg
```

```
lambda.min = glm_model$lambda.min # Save the lambda value which minimizes the error of the linear model
```

```
glm_coef = round(coef(glm_model,s= lambda.min),2) #Individual coefficients for variable included in the
```

```
plot(glm_model) # Plots mean squared error against log(Lambda).
```

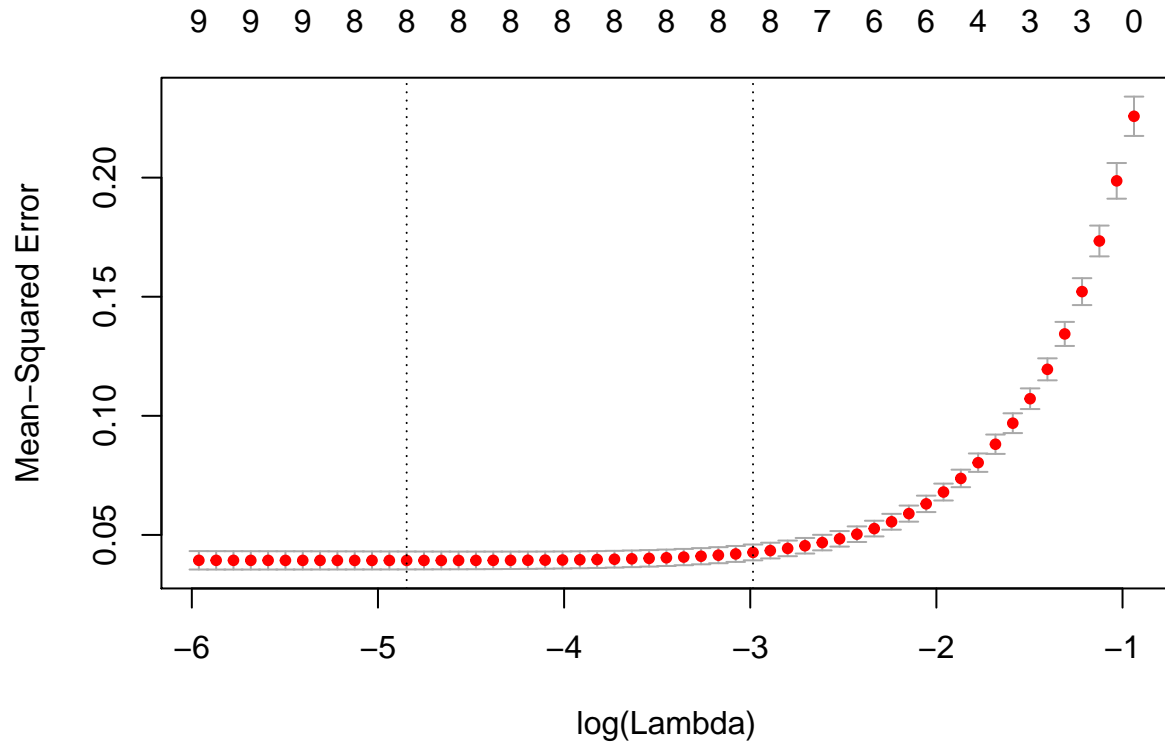

```
plot(glmnet(x_train,y_train, family="gaussian", alpha=1),"lambda",label=T, main="") #Plots coefficient
```

```
abline(v=log(lambda.min), lty=3) #Adds a vertical line to the plot of line 34 at the minimum level of l
```

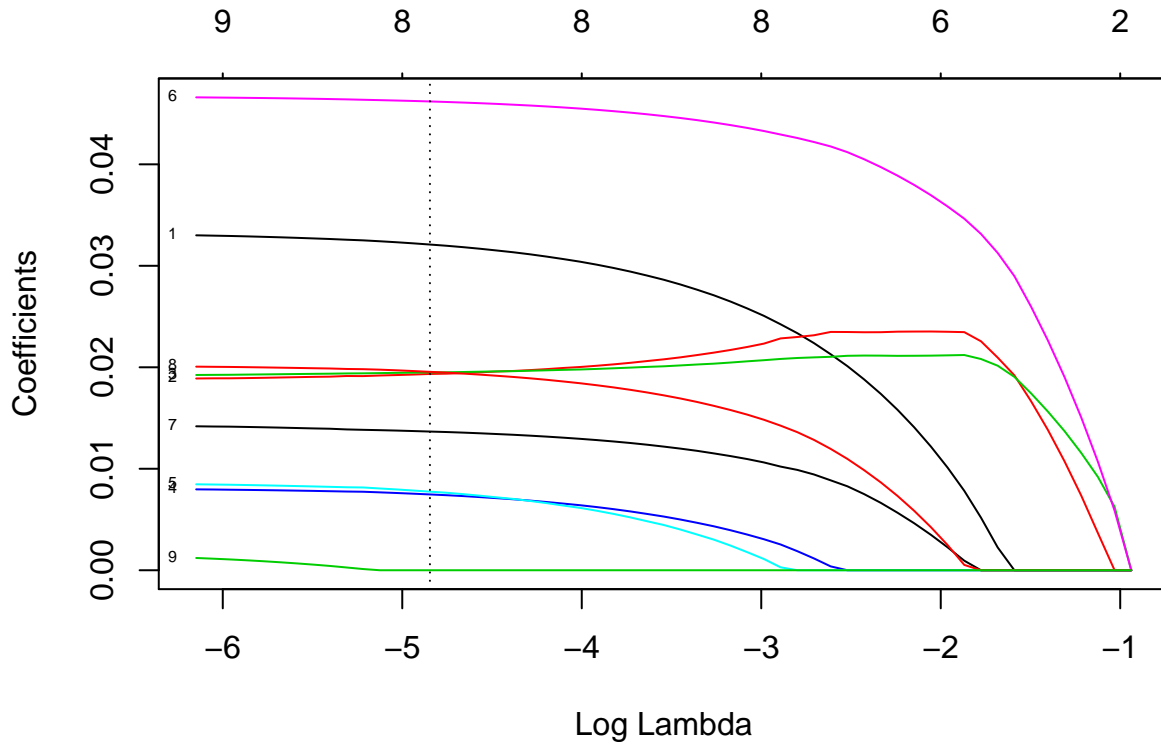

```
#install.packages("e1071") # Install latest verison of `e1071`. Only necessary once.
require(e1071) # Load e1071 package into this R session.
```

```
## Loading required package: e1071
```

```
svm_model = svm(x_train, y_train, cost = 1, gamma = c(1/(ncol(x_train)-1)), kernel="radial", cross=10)
```

```
## Warning in cret$results * scale.factor: Recycling array of length 1 in vector-array arithmetic is
## Use c() or as.vector() instead.
```

```
#install.packages("nnet") # Install latest verison of `nnet`. Only necessary once.
require(nnet) # Load e1071 package into this R session.
```

```
## Loading required package: nnet
```

```
nnet_model = nnet(x_train, y_train, size=5) #Fit a single-layer neural network to the data with 5 units
```

```
## # weights: 56
## initial value 112.078697
## iter 10 value 45.002542
## final value 40.999975
## converged
```

```
glm_pred = round(predict(glm_model, x_test, type="response"),0) # Create a vector of predicitons made f
svm_pred = round(predict(svm_model, x_test, type="response"),0) #Prediction vector for the SVM.
nnet_pred = round(predict(nnet_model, x_test, type="raw"),0) #Prediction vector for the neural network.
```

```
predictions = data.frame(glm_pred,svm_pred,nnet_pred) # Collate the three prediction vectors into a dat
names(predictions) = c("glm","svm","nnet") #Name the columns of the dataframe.
```

```
predictions$sum = rowSums(predictions) # Create a new column in the predictions dataset of the sum of
algorithms_n = 3 #Insert how many algorithms you have in your predictions data frame. In this case ther
predictions$ensemble_votes = round(predictions$sum/algorithms_n) #Create a new column containing the vo
```

```

print(predictions$ensemble_votes[1:30]) # Print the first 30 objects in the vector of predictions from
## [1] 0 0 0 0 0 1 0 0 0 1 0 1 0 0 0 0 0 0 1 0 1 0 1 0 0 1 0 0 0 1
#install.packages("caret") # Install the `caret` package. Only necessary once.
require(caret) # Load the caret package into this R session.

## Loading required package: caret
## Loading required package: lattice
## Loading required package: ggplot2
confusionMatrix(as.factor(glm_pred),as.factor(y_test))# Create a confusion matrix for the LASSO linear

## Confusion Matrix and Statistics
##
##           Reference
## Prediction  0    1
##           0 143    7
##           1    2   75
##
##           Accuracy : 0.9604
##           95% CI : (0.9261, 0.9817)
##           No Information Rate : 0.6388
##           P-Value [Acc > NIR] : <2e-16
##
##           Kappa : 0.9129
##           McNemar's Test P-Value : 0.1824
##
##           Sensitivity : 0.9862
##           Specificity : 0.9146
##           Pos Pred Value : 0.9533
##           Neg Pred Value : 0.9740
##           Prevalence : 0.6388
##           Detection Rate : 0.6300
##           Detection Prevalence : 0.6608
##           Balanced Accuracy : 0.9504
##
##           'Positive' Class : 0
##
confusionMatrix(as.factor(svm_pred),as.factor(y_test)) # Create a confusion matrix for the SVM.

## Confusion Matrix and Statistics
##
##           Reference
## Prediction  0    1
##           0 143    2
##           1    2   80
##
##           Accuracy : 0.9824
##           95% CI : (0.9555, 0.9952)
##           No Information Rate : 0.6388
##           P-Value [Acc > NIR] : <2e-16
##
##           Kappa : 0.9618

```

```

## McNemar's Test P-Value : 1
##
##           Sensitivity : 0.9862
##           Specificity : 0.9756
##           Pos Pred Value : 0.9862
##           Neg Pred Value : 0.9756
##           Prevalence : 0.6388
##           Detection Rate : 0.6300
##           Detection Prevalence : 0.6388
##           Balanced Accuracy : 0.9809
##
##           'Positive' Class : 0
##
confusionMatrix(as.factor(nnet_pred),as.factor(y_test)) # Create a confusion matrix for the neural netw

## Confusion Matrix and Statistics
##
##           Reference
## Prediction  0  1
##           0 130  8
##           1  15 74
##
##           Accuracy : 0.8987
##           95% CI : (0.8519, 0.9347)
##           No Information Rate : 0.6388
##           P-Value [Acc > NIR] : <2e-16
##
##           Kappa : 0.7844
##           McNemar's Test P-Value : 0.2109
##
##           Sensitivity : 0.8966
##           Specificity : 0.9024
##           Pos Pred Value : 0.9420
##           Neg Pred Value : 0.8315
##           Prevalence : 0.6388
##           Detection Rate : 0.5727
##           Detection Prevalence : 0.6079
##           Balanced Accuracy : 0.8995
##
##           'Positive' Class : 0
##
confusionMatrix(as.factor(predictions$ensemble_votes),as.factor(y_test)) # Create a confusion matrix f

## Confusion Matrix and Statistics
##
##           Reference
## Prediction  0  1
##           0 143  4
##           1  2 78
##
##           Accuracy : 0.9736
##           95% CI : (0.9434, 0.9902)
##           No Information Rate : 0.6388

```

```

##      P-Value [Acc > NIR] : <2e-16
##
##              Kappa : 0.9424
## Mcnemar's Test P-Value : 0.6831
##
##      Sensitivity : 0.9862
##      Specificity : 0.9512
##      Pos Pred Value : 0.9728
##      Neg Pred Value : 0.9750
##      Prevalence : 0.6388
##      Detection Rate : 0.6300
##      Detection Prevalence : 0.6476
##      Balanced Accuracy : 0.9687
##
##      'Positive' Class : 0
##

```

```

#install.packages("pROC") # Install the `pROC` package. Only necessary once.
require(pROC) # Load the caret package into this R session.

```

```

## Loading required package: pROC
## Type 'citation("pROC")' for a citation.
##
## Attaching package: 'pROC'
## The following object is masked from 'package:glmnet':
##
##      auc
## The following objects are masked from 'package:stats':
##
##      cov, smooth, var

```

```

roc_glm = roc(as.vector(y_test),as.vector(glm_pred)) #Conduct the ROC analyses
roc_svm = roc(as.vector(y_test), as.vector(svm_pred))
roc_nnet = roc(as.vector(y_test), as.vector(nnet_pred))

plot.roc(roc_glm, ylim=c(0,1), xlim=c(1,0)) #Plot the ROC curves
lines(roc_glm, col="blue")
lines(roc_nnet, col="green")
lines(roc_svm, col="red")
legend("bottomright", legend=c("General Linear Model", "Support Vector Machine", "Neural
Net"), col=c("blue","red","green"), lwd=2)

```

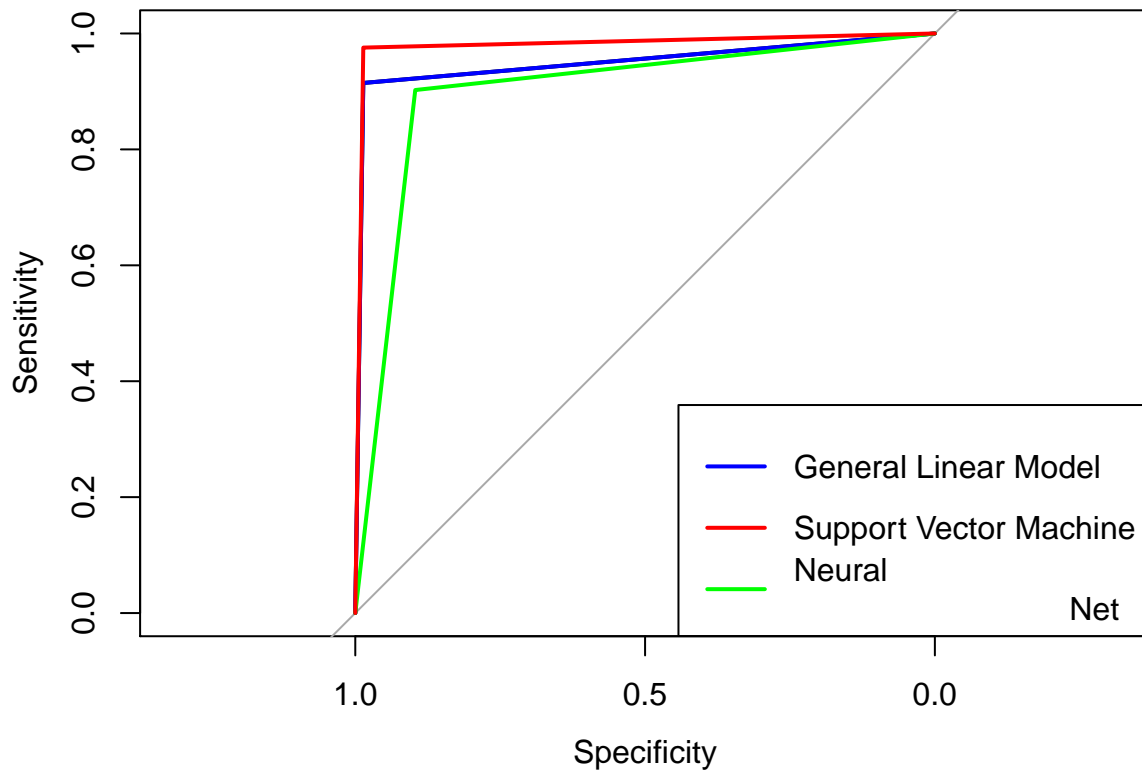

```
auc_glm = auc(roc_glm)#Calculate the area under the ROC curve
auc_svm = auc(roc_svm)#Calculate the area under the ROC curve
auc_nnet = auc(roc_nnet)#Calculate the area under the ROC curve
```

```
# The code below sets the values for the features to be evaluated by the trained and validated model.
thickness = 8
cell_size = 7
cell_shape = 8
adhesion = 5
epithelial_size = 5
bare_nuclei = 7
bland_cromatin = 9
normal_nucleoli = 8
mitoses = 10
```

```
new_data = c(thickness,cell_size,cell_shape,adhesion,
             epithelial_size,bare_nuclei,bland_cromatin,normal_nucleoli ,mitoses) #Comine the data t
```

```
new_pred_glm = predict(glm_model ,data.matrix(t(new_data))
                      ,type="response") #Apply the new data to the validated model
```

```
new_pred_svm = predict(svm_model ,data.matrix(t(new_data))
                      ,type="response")
```

```
new_pred_nnet = predict(nnet_model ,data.matrix(t(new_data)),type="raw")
```

```
print(new_pred_glm) #Print the prediction for the new data from the glm.
```

```
## 1
## [1,] 0.9139385
```

```
print(new_pred_svm) #Print the prediction for the new data from the svm.
```

```
##           1  
## 0.9803988
```

```
print(new_pred_nnet) #Print the prediction for the new data from the nnet.
```

```
##           [,1]  
## [1,] 0.9999967
```
